# Supplementary material for: Cryptic genetic variation shapes the adaptive evolutionary potential of enzymes
Source: eLife journal article supplement (doi:10.7554/elife.40789), 2019-02-04
Supplement: supp [file elife-40789-supp-v1.zip]

Figure 1 - figure supplement 1

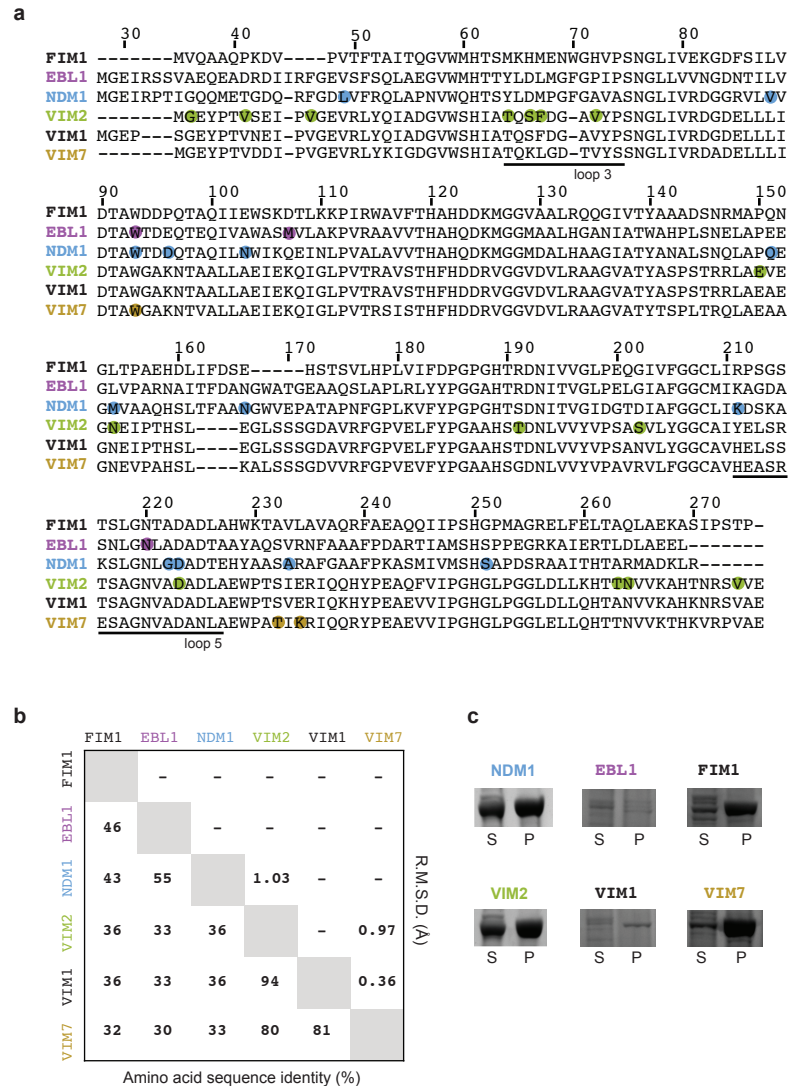

**Figure 1-figure supplement 1.** Sequence comparison between metallo-β-lactamases. (A) Sequence alignment of selected metallo-β-lactamases. Residue number is based on the NDM1 sequence (PDB-ID 3spu). Positions that were mutated and selected during the directed evolution of PMH activities are highlighted in color. Actual mutations are listed in **Supplementary File 1B**. (B) Sequence identity and structure similarity among selected B1 β-lactamases. A multiple sequence alignment of the nine B1 β-lactamases using ClustalW2 (standard parameters), which was then used to calculate the pairwise sequence identities using the web based program SIAS (<http://imed.med.ucm.es/Tools/sias.html>) with gaps taken into account. To determine pairwise structural similarity, we computed the root mean standard deviation (RMSD) between all structure pairs using the align command PyMOL. (C) SDS-PAGE images of protein expression in the supernatant (S) and pellet (P) fractions of the cell lysate. Images for NDM1 and Vim2 are the same as the ones used in **Figure 3-figure supplement 1**.
