# Supplementary material for: Cryptic genetic variation shapes the adaptive evolutionary potential of enzymes
Source: eLife journal article supplement (doi:10.7554/elife.40789), 2019-02-04
Supplement: supp [file elife-40789-supp-v1.zip]

**Figure 3-figure supplement 3**

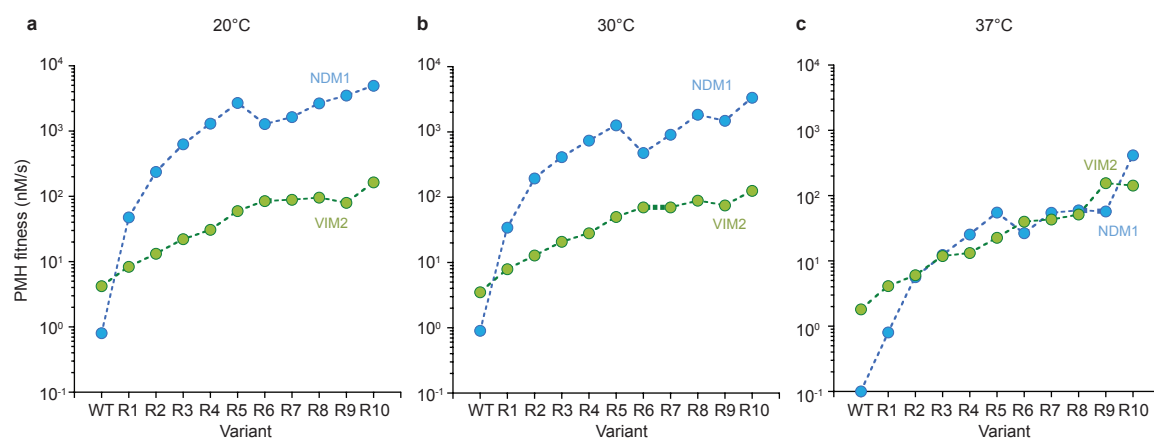

**Figure 3-figure supplement 3.** Effect of expression temperature on cell lysate PMH fitness (cell lysate activity in nM/s). Variants of NDM1 (blue) and VIM2 (green) were expressed at (A) 20°C, (B) 30°C, and (C) 37°C. Cell lysate preparation and PMH fitness measurement were performed identically for all expression temperatures.
