# Supplementary material for: Cryptic genetic variation shapes the adaptive evolutionary potential of enzymes
Source: eLife journal article supplement (doi:10.7554/elife.40789), 2019-02-04
Supplement: supp [file elife-40789-supp-v1.zip]

**Figure 3-figure supplement 1**

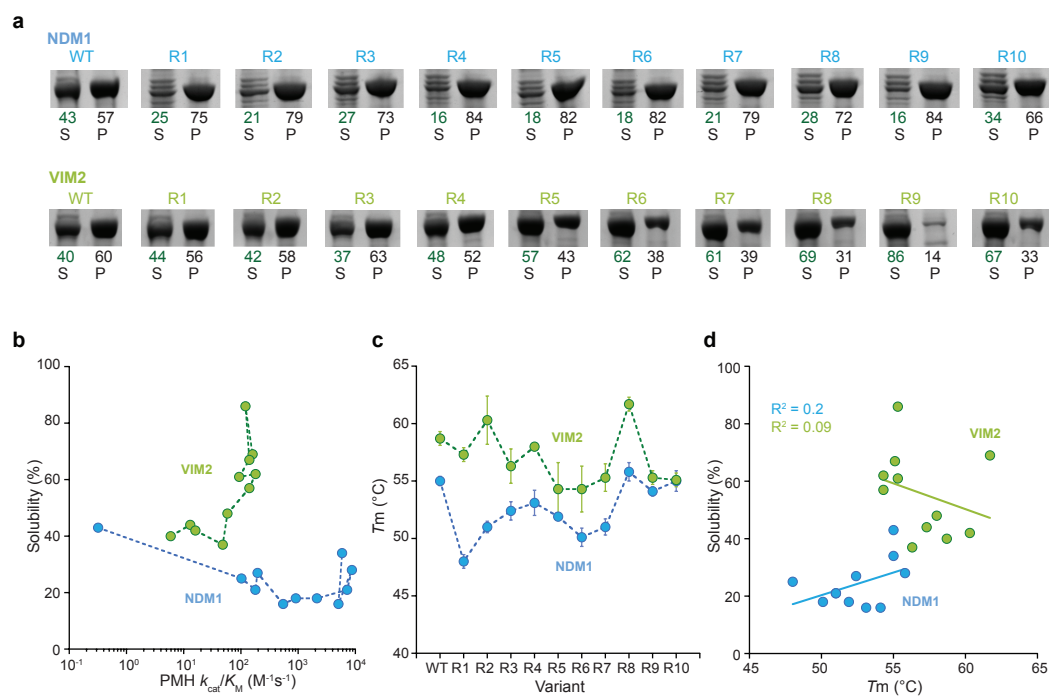

**Figure 3-figure supplement 1.** Solubility and melting temperature of variants. (A) SDS-PAGE images of protein expression in the supernatant (S) and pellet (P) fractions of the cell lysate. The numbers below indicate the percentage of protein in the soluble and insoluble fraction, which is calculated from the relative intensities of the supernatant and pellet bands. (B) Correlation between solubility and catalytic efficiency along the evolutionary trajectories. (C) Melting temperature ( $T_m$ ) of all variants along the evolutionary trajectory as calculated from the midpoint of the denaturation curve in a thermal shift assay. Error bars represent standard deviation from three independent assays. (D) Correlation between solubility and melting temperature ( $T_m$ ) of NDM1 and VIM2 variants.
