# Supplementary material for: Cryptic genetic variation shapes the adaptive evolutionary potential of enzymes
Source: eLife journal article supplement (doi:10.7554/elife.40789), 2019-02-04
Supplement: supp [file elife-40789-supp-v1.zip]

Archive with 14 entries (14 files):
- elife_poa_e40789_Figure_5_figure_supplement_2.pdf
- elife_poa_e40789_Supplementary_file_1.docx
- elife_poa_e40789_Supplementary_file_4.docx
- elife_poa_e40789_Figure_3_figure_supplement_1.pdf
- elife_poa_e40789_Transparent_Reporting_File.pdf
- elife_poa_e40789_Supplementary_File_2.docx
- elife_poa_e40789_Figure_4_figure_supplement_1.pdf
- elife_poa_e40789_Figure_1_figure_supplement_1.pdf
- elife_poa_e40789_Figure_3_figure_supplement_2.pdf
- elife_poa_e40789_Supplementary_file_3.docx
- elife_poa_e40789_Figure_3_figure_supplement_3.pdf
- elife_poa_e40789_Figure_2_figure_supplement_2.pdf
- elife_poa_e40789_Figure_2_figure_supplement_1.pdf
- elife_poa_e40789_Figure_5_figure_supplement_1.pdf
