# Supplementary material for: Cryptic genetic variation shapes the adaptive evolutionary potential of enzymes
Source: eLife journal article supplement (doi:10.7554/elife.40789), 2019-02-04
Supplement: supp [file elife-40789-supp-v1.zip › elife_poa_e40789_Figure_3_figure_supplement_2.pdf]

**Figure 3-figure supplement 2**

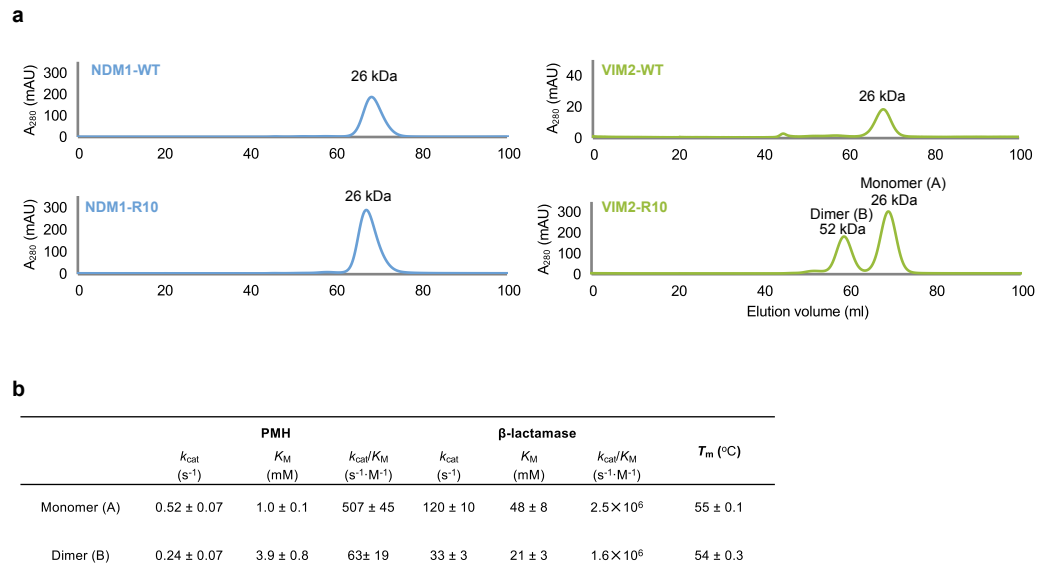

**Figure 3-figure supplement 2.** Oligomerization states of NDM1 and VIM2. (A) Size-exclusion chromatography (SEC) elution profile of NDM1-WT, NDM1-R10, VIM2-WT and VIM2-R10 (Superdex 75, GE Healthcare). Protein sizes were identified based on the calibration curve on the manufacturer's instruction (GE Healthcare) for gel filtration calibration kits LMW (low molecular weight). VIM-R10 showed two peaks that correspond to monomeric and dimeric states. (B) Kinetic parameters and melting temperature ( $T_m$ ) of monomer and dimer states of VIM2-R10.
